# Supplementary material for: Strong Selection at MHC in Mexicans since Admixture
Source: PubMed Central journal article supplement (PMC4749250; doi:10.1371/journal.pgen.1005847), 2016-02-10
Supplement: pgen.1005847.s001.pdf [file pgen.1005847.s001.pdf]

## Supporting Information

Strong Selection at MHC in Mexicans since Admixture. Q. Zhou, L. Zhao, Y. Guan.  
PLoS Genetics. 2016

| Training set | Ancestry   | ssd   | Min   | Mean  | Max   |
|--------------|------------|-------|-------|-------|-------|
| CEU-YRI-MAYA | African    | 0.017 | 0.047 | 0.079 | 0.325 |
|              | Amerindian | 0.034 | 0.941 | 1.104 | 1.258 |
|              | European   | 0.033 | 0.676 | 0.818 | 0.967 |
| CEU-MKK-MAYA | African    | 0.018 | 0.056 | 0.095 | 0.354 |
|              | Amerindian | 0.033 | 0.934 | 1.109 | 1.236 |
|              | European   | 0.032 | 0.659 | 0.796 | 0.960 |
| TSI-YRI-MAYA | African    | 0.013 | 0.046 | 0.076 | 0.263 |
|              | Amerindian | 0.032 | 0.954 | 1.116 | 1.250 |
|              | European   | 0.031 | 0.680 | 0.808 | 0.953 |
| TSI-MKK-MAYA | African    | 0.014 | 0.053 | 0.088 | 0.260 |
|              | Amerindian | 0.032 | 0.937 | 1.118 | 1.260 |
|              | European   | 0.030 | 0.670 | 0.794 | 0.939 |
| ALL          | African    | 0.016 | 0.050 | 0.083 | 0.297 |
|              | Amerindian | 0.033 | 0.933 | 1.102 | 1.224 |
|              | European   | 0.031 | 0.708 | 0.815 | 0.949 |

**Table S1:** Summary statistics for different sets of training samples for autosomes of the Lipid dataset. ALL means CEU+TSI-YRI+MKK-MAYA, and ssd means sample standard deviation.
