# Supplementary material for: Strong Selection at MHC in Mexicans since Admixture
Source: PubMed Central journal article supplement (PMC4749250; doi:10.1371/journal.pgen.1005847), 2016-02-10
Supplement: pgen.1005847.s002.pdf [file pgen.1005847.s002.pdf]

## Supporting Information

Strong Selection at MHC in Mexicans since Admixture. Q. Zhou, L. Zhao, Y. Guan.  
PLoS Genetics. 2016

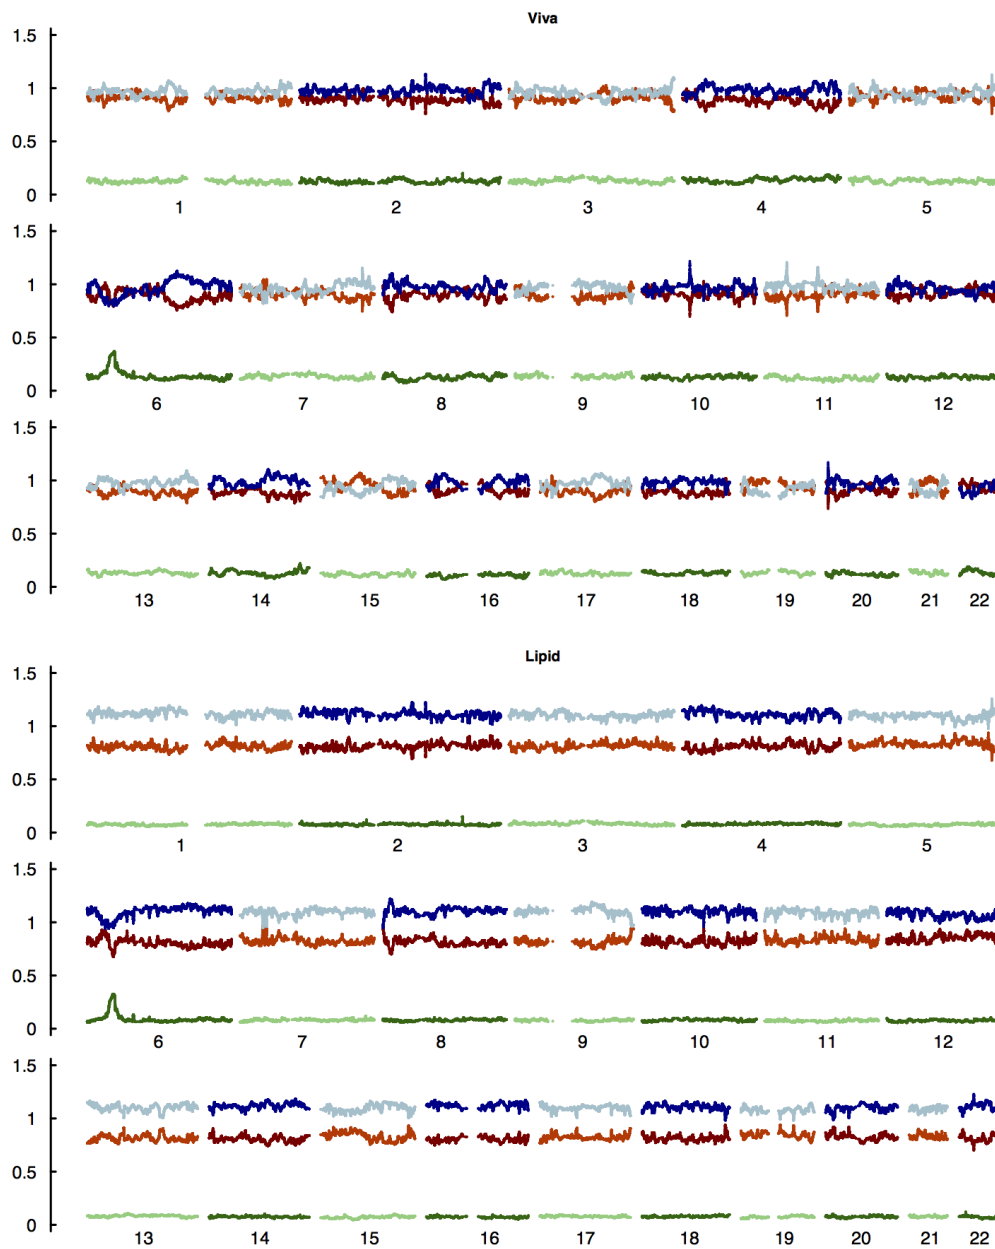

**Figure S1A** Average dosages for Amerindian (blue), European (red), and African (green) ancestries for Viva and Lipid datasets with training samples of CEU+YRI+Maya. Plot shows all 22 autosomes.

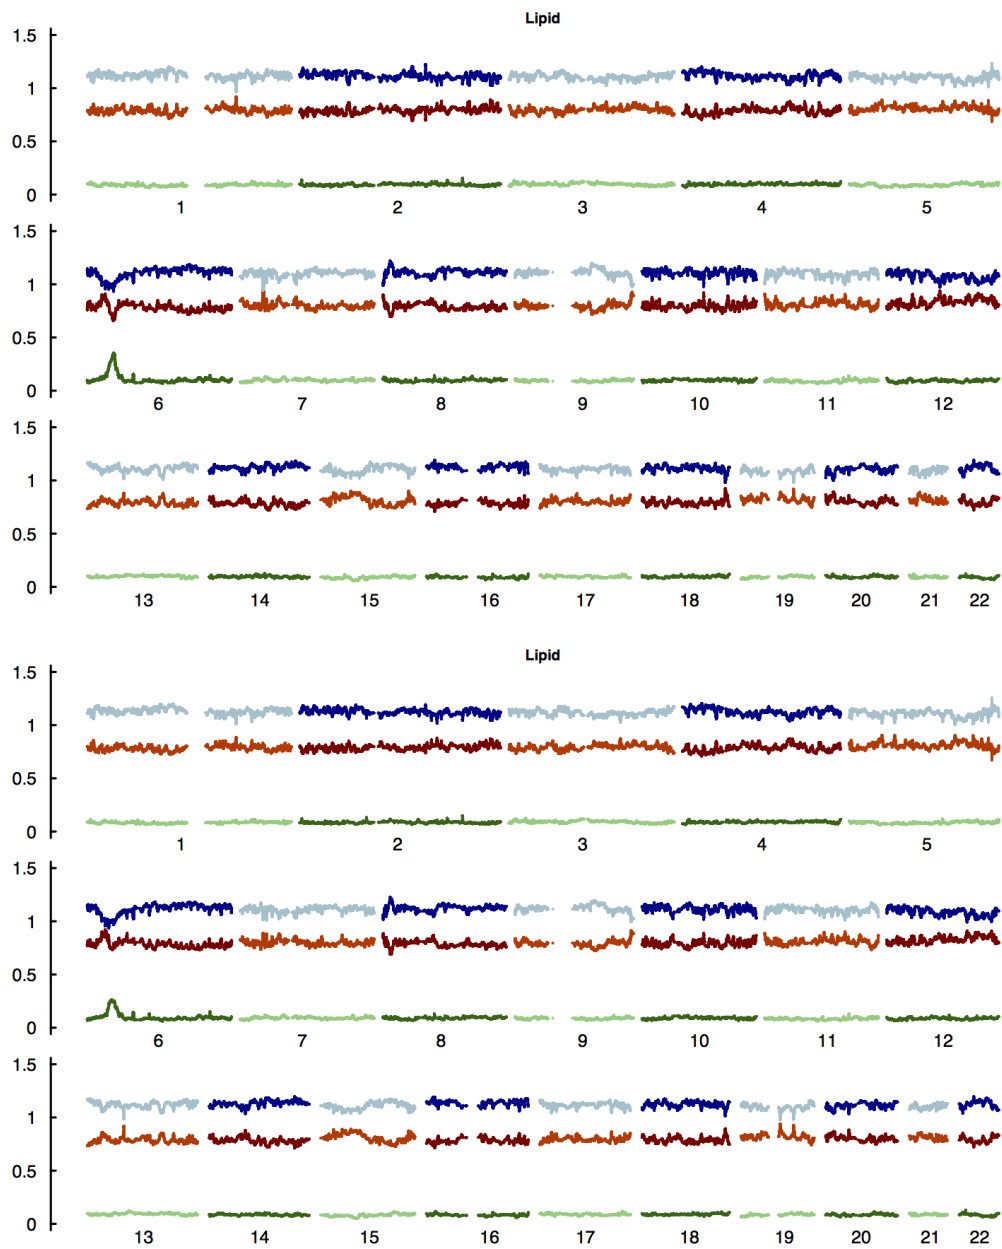

**Figure S1B** Average dosages for Amerindian (blue), European (red), and African (green) ancestries for Lipid datasets with training samples of CEU+MKK+Maya, and TSI+MKK+Maya.

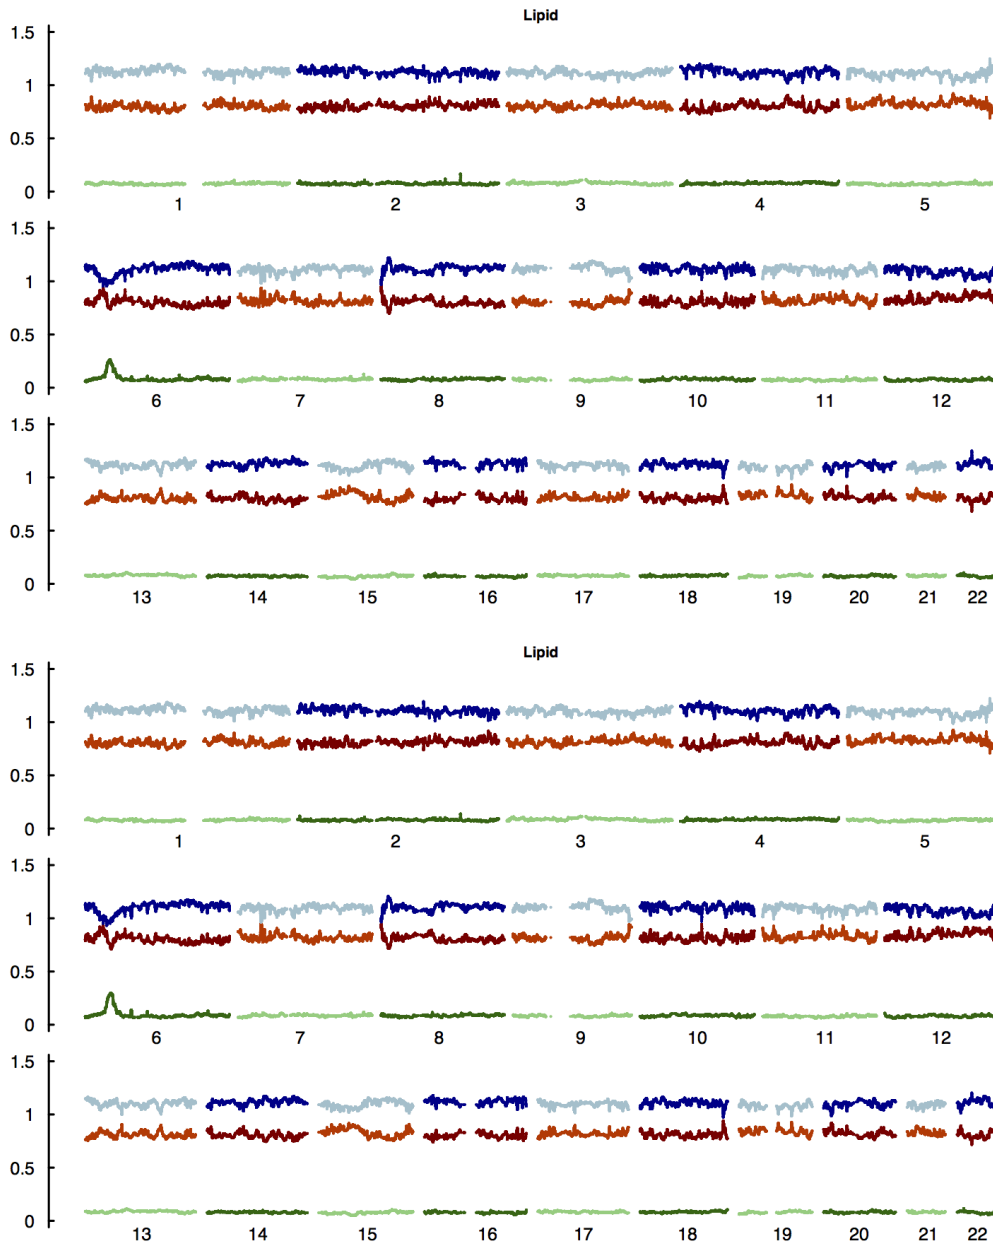

**Figure S1C** Average dosages for Amerindian (blue), European (red), and African (green) ancestries for Lipid datasets with training samples of TSI+YRI+Maya, and CEU-TSI+YRI-MKK+Maya.
