# Supplementary material for: Strong Selection at MHC in Mexicans since Admixture
Source: PubMed Central journal article supplement (PMC4749250; doi:10.1371/journal.pgen.1005847), 2016-02-10
Supplement: pgen.1005847.s003.pdf [file pgen.1005847.s003.pdf]

## Supporting Information

Strong Selection at MHC in Mexicans since Admixture. Q. Zhou, L. Zhao, Y. Guan.  
PLoS Genetics. 2016

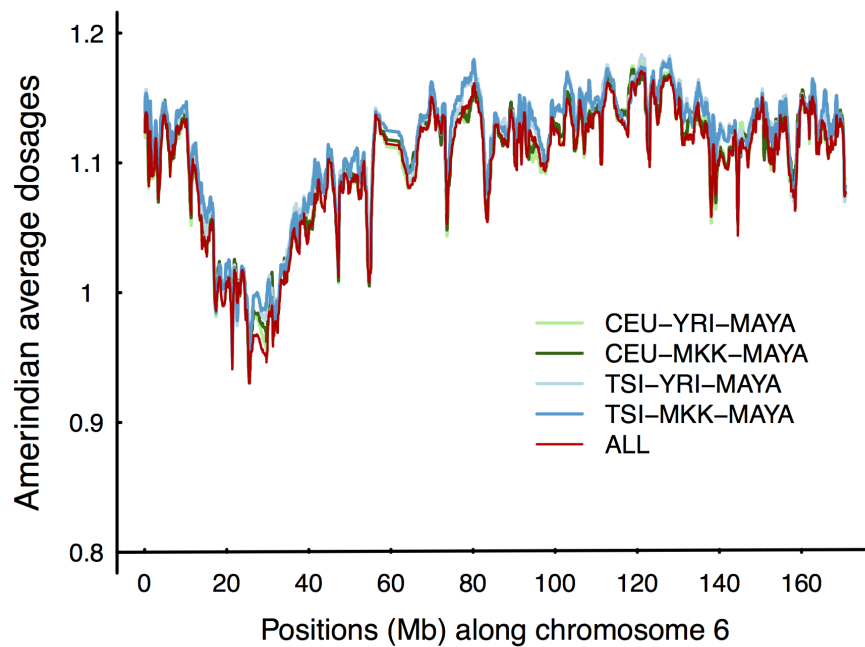

**Fig S2.** Comparison of Amerindian ancestry dosages for five sets of training samples shown in the legend, where ALL means CEU+TSI-YRI+MKK-MAYA. The comparison was performed with chromosome 6 of Lipid dataset.
