# Supplementary material for: Strong Selection at MHC in Mexicans since Admixture
Source: PubMed Central journal article supplement (PMC4749250; doi:10.1371/journal.pgen.1005847), 2016-02-10
Supplement: pgen.1005847.s004.pdf [file pgen.1005847.s004.pdf]

## Supporting Information

Strong Selection at MHC in Mexicans since Admixture. Q. Zhou, L. Zhao, Y. Guan.  
PLoS Genetics. 2016

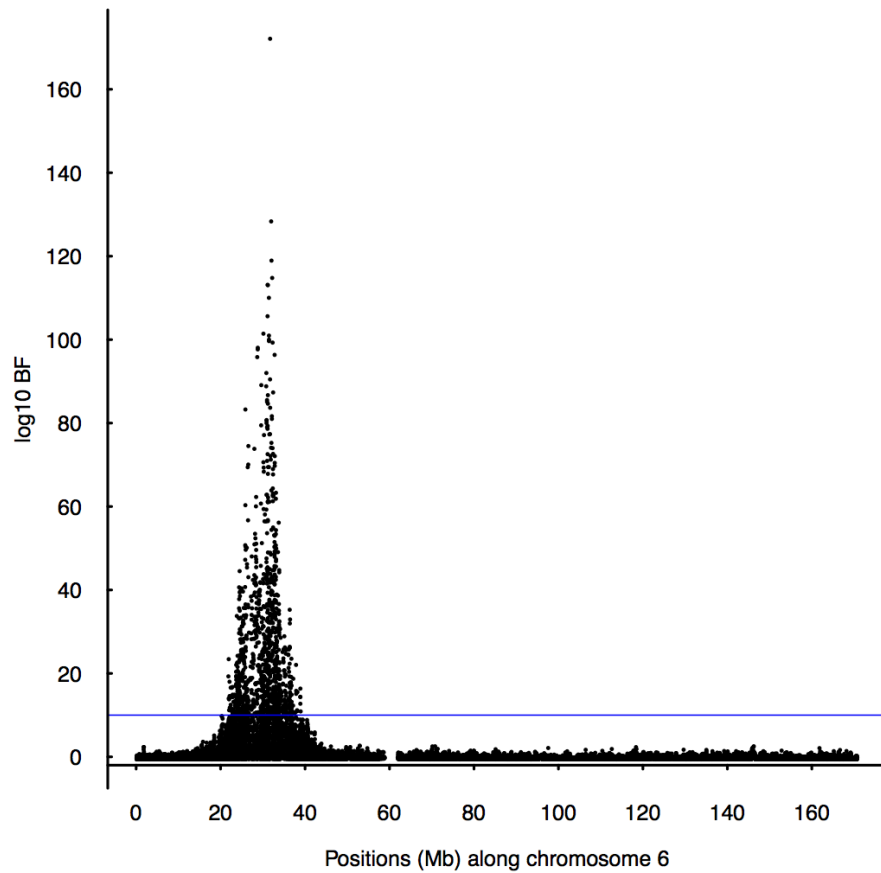

**Fig S3.** SNP associated with enrichment of African local ancestry in Mexican lipid study. Bayes factors (BF) were computed using BIMBAM. The horizontal blue line is  $\log_{10} BF = 10$ .
