# Supplementary material for: Strong Selection at MHC in Mexicans since Admixture
Source: PubMed Central journal article supplement (PMC4749250; doi:10.1371/journal.pgen.1005847), 2016-02-10
Supplement: pgen.1005847.s005.pdf [file pgen.1005847.s005.pdf]

# Supporting Information

Strong Selection at MHC in Mexicans since Admixture. Q. Zhou, L. Zhao, Y. Guan.  
PLoS Genetics. 2016

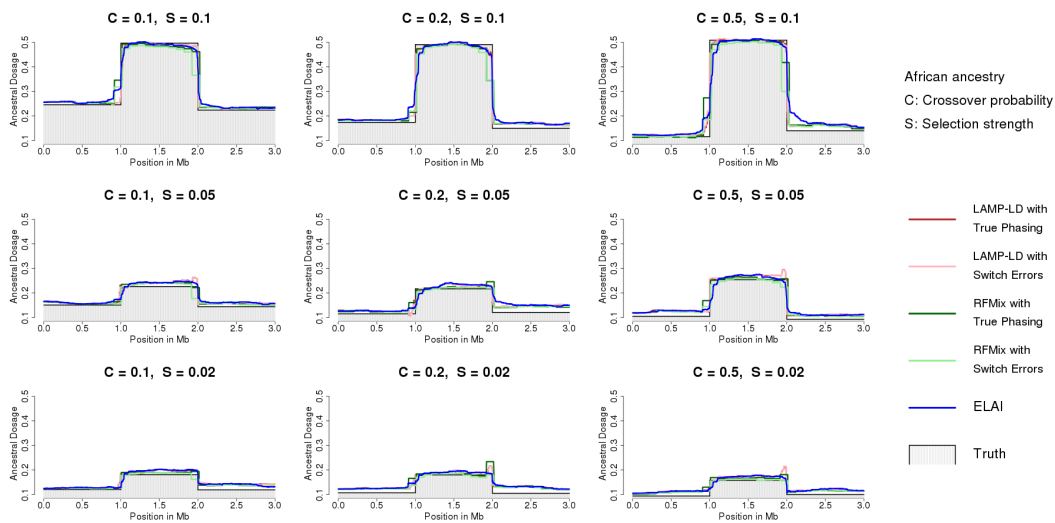

**Fig S4A: Comparison between LAMP-LD, RFMix, and ELAI under different simulation conditions, Part I** There are 9 combinations of crossover probability (0.1, 0.2, and 0.5) and selection coefficients (0.02, 0.05, and 0.10) for two sizes of the mid-section. This plot is for mid-section of size 1 Mb. The mid-section harbors alleles under selection, and a smaller size produces a more challenging problem. Plots also compare effects of phasing errors (2% for cohort and the Amerindian training sample and 1% for the other two training samples). RFMix underperformed after phasing errors were introduced in (b). Compared to RFMix, LAMP-LD was less sensitive to phasing errors. ELAI was unaffected by phasing errors. Parameters for LAMP-LD: window size = 100, number of HMM states = 25; for RFMix: window size = 0.1 cM, which approximately contains 100 SNPs. Both parameter settings were used by the 1000 Genomes admixture analysis group.

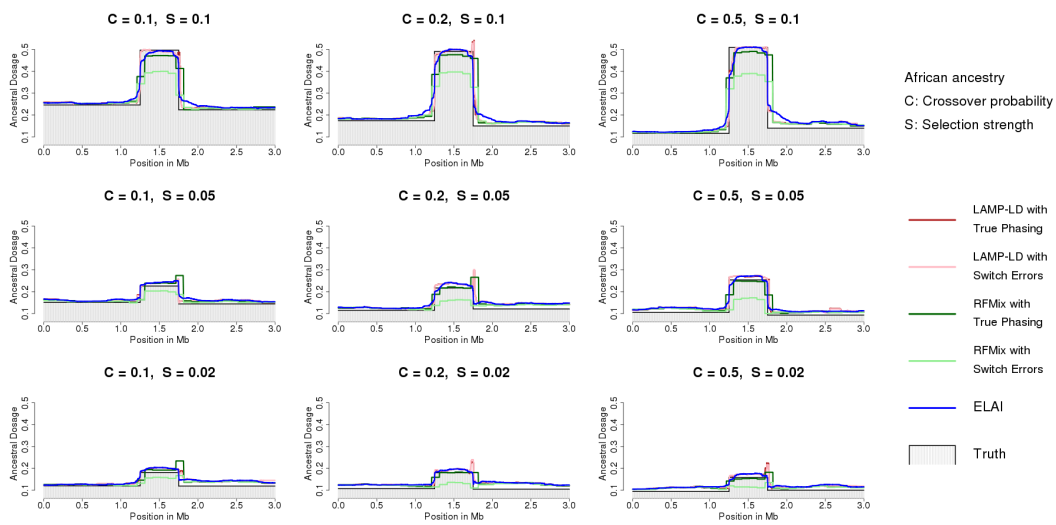

**Fig S4B: Comparison between LAMP-LD, RFMix, and ELAI under different simulation conditions, Part II.** The same simulation setup as in Fig S4A but with mid-section of size 0.5 Mb.

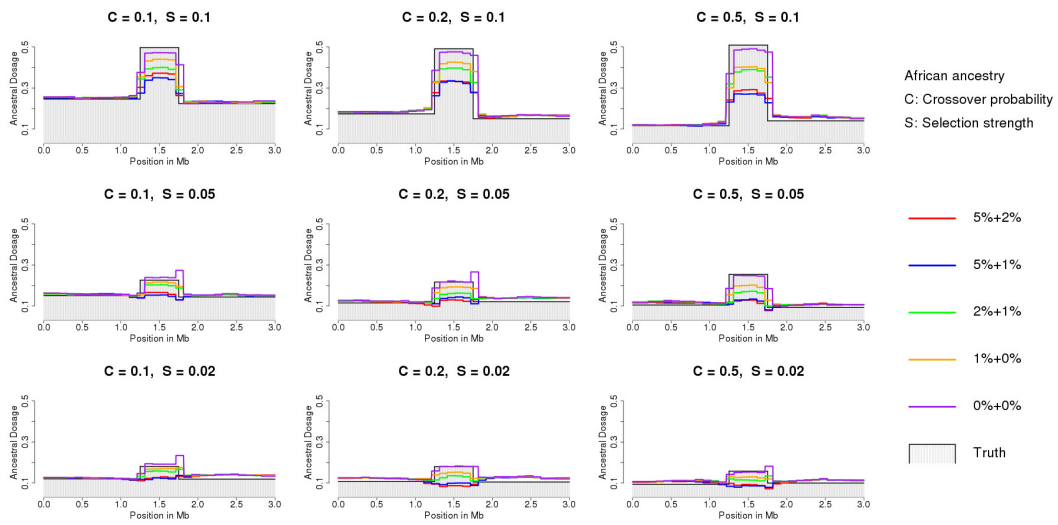

**Fig S4C: RFMix performance with different switch-errors.** This is the same dataset as used in Fig S4B. In the legends, the number before the plus sign is the switch-error for cohort and the Amerindian training sample, and the number after is for the European and African training samples.

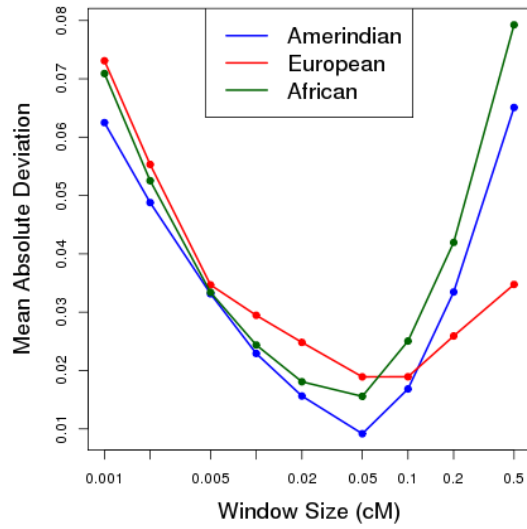

**Fig S4D: RFMix performance with different choices of window size.** The mean absolute deviation was computed from the same dataset that was used in Fig S4B and averaged over 9 simulation parameter settings (recombination probability and selection strength). The switch-errors were 2% for cohort and the Amerindian training sample and 1% for the other two training samples. We used centi-Morgan (cM) to measure the window size, which is the unit used by RFMix. In our simulations, 1 cM contains roughly 1000 SNPs.

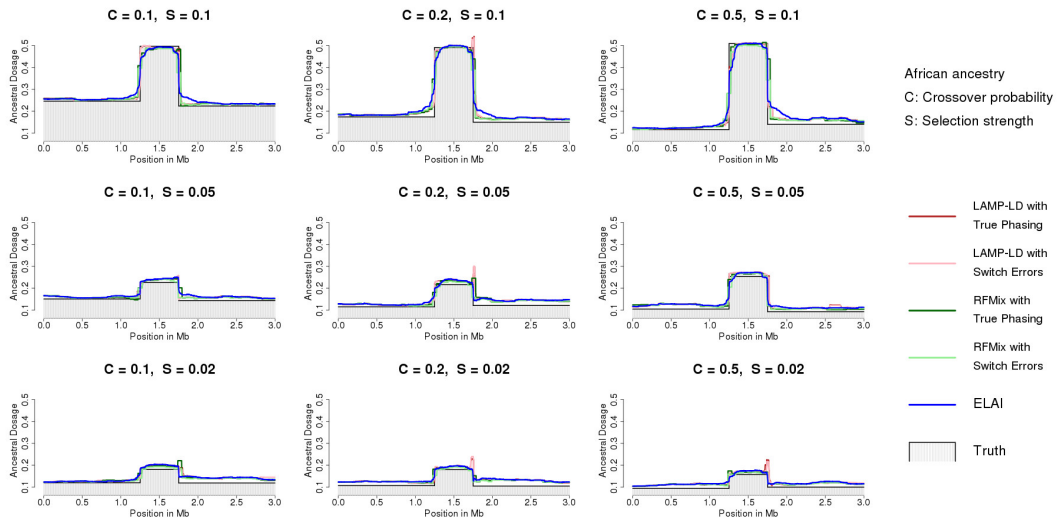

**Fig S4E: RFMix performs well with the optimal window size.** This is the same dataset as used in Fig S4B. When the optimal window size is used, RFMix performs well in the presence of phasing errors (2% for cohort and the Amerindian training sample and 1% for the other two training samples).
