# Supplementary material for: Strong Selection at MHC in Mexicans since Admixture
Source: PubMed Central journal article supplement (PMC4749250; doi:10.1371/journal.pgen.1005847), 2016-02-10
Supplement: pgen.1005847.s006.pdf [file pgen.1005847.s006.pdf]

## Supporting Information

Strong Selection at MHC in Mexicans since Admixture. Q. Zhou, L. Zhao, Y. Guan.  
PLoS Genetics. 2016

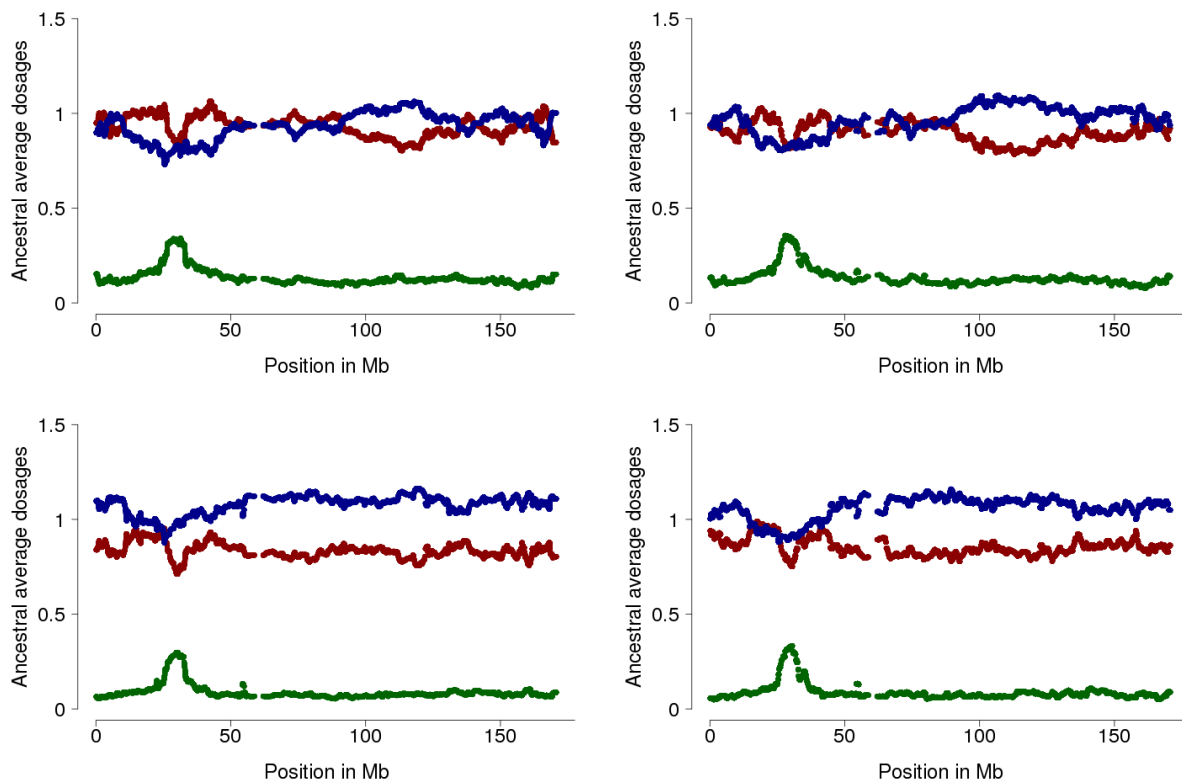

**Fig S5.** LAMP-LD (first column) and RFMix (second column) discovered excessive peak at MHC in both Viva (first row) and Lipid (second row) data.
